# Supplementary material for: A Pilot Single Cell Analysis of the Zebrafish Embryo Cellular Responses to Uropathogenic Escherichia coli Infection
Source: PubMed Central journal article supplement (PMC8843076; doi:10.20411/pai.v7i1.479), 2022-02-04
Supplement: pai-7-1-s01.pdf [file pai-7-1-s01.pdf]

| <b>Supplemental material S1, summary of scRNA-seq results</b> |        |        |
|---------------------------------------------------------------|--------|--------|
|                                                               | Saline | UPEC   |
| Cells                                                         | 2,810  | 21,830 |
| Genes per cell (median)                                       | 1,004  | 711    |
| Fraction reads in cell                                        | 91.9%  | 87.9   |
| Median UMI counts per cell                                    | 4,315  | 3,374  |
| Total genes detected                                          | 23,149 | 25,610 |
| Reads mapped to genome                                        | 91.5   | 95     |
| Reads mapped confidently to genome                            | 84.4   | 84.2   |
| Reads mapped confidently to intergenic regions                | 6.8    | 7.5    |
| Reads mapped confidently to intronic regions                  | 7.0    | 6.4    |
| Reads mapped confidently to exonic regions                    | 70.5   | 70.3   |
| Reads mapped confidently to transcriptome                     | 67.2   | 67.2   |
| Reads mapped antisense to gene                                | 1.1    | 1.1    |
