# Supplementary material for: A Pilot Single Cell Analysis of the Zebrafish Embryo Cellular Responses to Uropathogenic Escherichia coli Infection
Source: PubMed Central journal article supplement (PMC8843076; doi:10.20411/pai.v7i1.479), 2022-02-04
Supplement: pai-7-1-s02.pdf [file pai-7-1-s02.pdf]

| Supplemental material S2. Cluster assignment by differentially expressed genes |                                          |                  |                    |                 |                  |
|--------------------------------------------------------------------------------|------------------------------------------|------------------|--------------------|-----------------|------------------|
| Cluster                                                                        | Assignment                               |                  |                    |                 |                  |
| 0                                                                              | Hematopoietic/erythroid progenitor cells | <i>Kreg1</i>     | <i>hbbe2</i>       | <i>Hbae1.1</i>  | <i>Hbae3</i>     |
| 1                                                                              | Hematopoietic/erythroid progenitor cells | <i>Alas2</i>     | <i>Cahz</i>        | <i>Slc4a1a</i>  | <i>Epb41b</i>    |
| 2                                                                              | Hematopoietic/erythroid progenitor cells | <i>Hbae1.3.1</i> | <i>Alas2</i>       | <i>Hbae3</i>    | <i>Hbbe1.2</i>   |
| 3                                                                              | Hematopoietic/erythroid progenitor cells | <i>Alas2</i>     | <i>Cahz</i>        | <i>Hbbe1.2</i>  | <i>Hemgn</i>     |
| 4                                                                              | Ventral and intermediate mesoderm        | <i>Hmbsa</i>     | <i>Mki67</i>       | <i>Znfl2a</i>   |                  |
| 5                                                                              | Muscle                                   | <i>Col6a1</i>    | <i>Col6a2</i>      |                 |                  |
| 6                                                                              | Integument <sup>#</sup>                  | <i>Colla2</i>    | <i>Aqp3a</i>       | <i>Rbp4</i>     |                  |
| 7                                                                              | Pectoral fin                             | <i>Fgfbp2b</i>   | <i>Matn1</i>       | <i>Col9a2</i>   | <i>F13a1b</i>    |
| 8                                                                              | Skeletal system                          | <i>Col2a1a</i>   | <i>Ucmab</i>       |                 |                  |
| 9                                                                              | Enveloping layer                         | <i>Gbgt114</i>   | <i>Anxa1c</i>      | <i>Capn9</i>    | <i>Ppl</i>       |
| 10                                                                             | Cardiac muscle                           | <i>Tcap</i>      | <i>Desma</i>       | <i>Tnnc2</i>    |                  |
| 11                                                                             | Epidermis                                | <i>Lgals111</i>  | <i>Apoeb</i>       | <i>Krt91</i>    | <i>krtt1c19e</i> |
| 12                                                                             | Thymus                                   | <i>Ccr9a</i>     | <i>Cc9ra</i>       | <i>Coro1a</i>   | <i>Ccl38.6</i>   |
| 13                                                                             | Pronephric mesoderm                      | <i>Ndrgl1a</i>   | <i>Cd63</i>        |                 |                  |
| 14                                                                             | Ionocyte <sup>^</sup>                    | <i>Atp6v1ba</i>  | <i>Atp6v1g1</i>    | <i>Rnaseka</i>  | <i>Atp6ap1b</i>  |
| 15                                                                             | Tail bud                                 | <i>Fnl1a</i>     | <i>Ifitm1</i>      |                 |                  |
| 16                                                                             | Enveloping layer                         | <i>Cldne</i>     | <i>Tmem176l.3b</i> |                 |                  |
| 17                                                                             | Pleuroperitoneal region                  | <i>Cldnh</i>     | <i>Cldn15la</i>    | <i>Gstp2</i>    |                  |
| 18                                                                             | Macrophage                               | <i>Samsn1a</i>   | <i>Ctss.2</i>      |                 |                  |
| 19                                                                             | Pectoral fin bud                         | <i>Ptx3a</i>     | <i>Angptl6</i>     | <i>And1</i>     | <i>And2</i>      |
| 20                                                                             | Melanosome/melanoblast                   | <i>Dct</i>       | <i>Tyrp1b</i>      | <i>Slc45a2</i>  | <i>Tyrp1a</i>    |
| 21                                                                             | Neural tube                              | <i>Elavl3</i>    | <i>Gpm6aa</i>      | <i>Stmn1b</i>   |                  |
| 22                                                                             | Nervous system                           | <i>Mbpa</i>      | <i>Mag</i>         | <i>Tmem125b</i> |                  |
| 23                                                                             | Pigment cell                             | <i>Ednrba</i>    | <i>ltk</i>         | <i>Mlphb</i>    |                  |
| 24                                                                             | Mucous secreting cell                    | <i>Cln2c</i>     | <i>Dmrt2a</i>      |                 |                  |
| 25                                                                             | Yolk syncytial layer                     | <i>Pla2g12b</i>  | <i>Acs15</i>       | <i>Fabp1b.1</i> | <i>ApoE</i>      |
| 26                                                                             | Cartilage element                        | <i>Matn</i>      | <i>Cnmd</i>        | <i>Snorc</i>    | <i>Ucmab</i>     |
| 27                                                                             | Liver                                    | <i>Fabp10a</i>   | <i>Apoc.1</i>      | <i>Apoa1b</i>   | <i>Ucp1</i>      |
| 28                                                                             | Spleen                                   | <i>Il4</i>       | <i>Il18</i>        |                 |                  |
| 29                                                                             | Pronephros                               | <i>Pax2a</i>     | <i>Foxj1a</i>      | <i>Slc26a1</i>  | <i>Hnfbb</i>     |
| 30                                                                             | Digestive system                         | <i>Itln</i>      | <i>Ccr9a</i>       |                 |                  |
| 31                                                                             | Pancreas                                 | <i>Cela1.5a</i>  | <i>Cpa4</i>        | <i>Cpa5</i>     | <i>Ctrb1</i>     |
| 32                                                                             | Vasculature                              | <i>Sele</i>      | <i>Myct1a</i>      | <i>Lyve1a</i>   | <i>Stab1</i>     |
