# Supplementary material for: A Pilot Single Cell Analysis of the Zebrafish Embryo Cellular Responses to Uropathogenic Escherichia coli Infection
Source: PubMed Central journal article supplement (PMC8843076; doi:10.20411/pai.v7i1.479), 2022-02-04

**A**

Light microscopy

Control

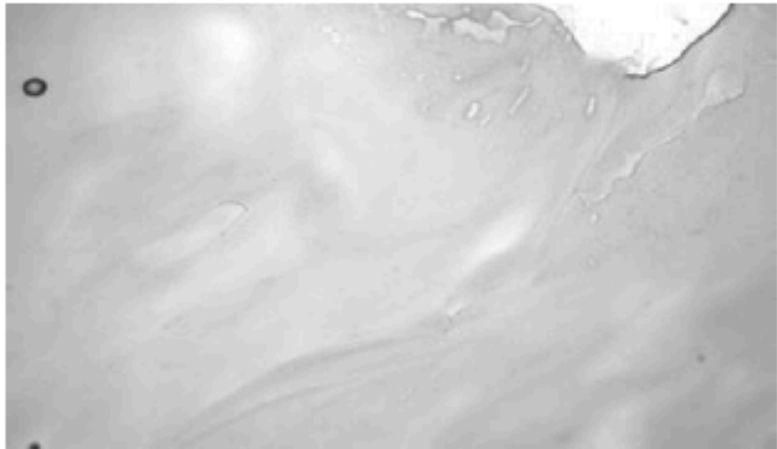**B**

Red fluorescence

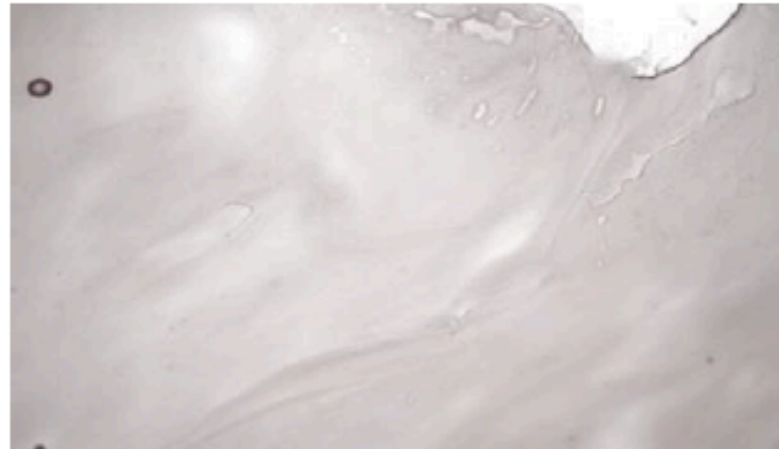Experimental **C**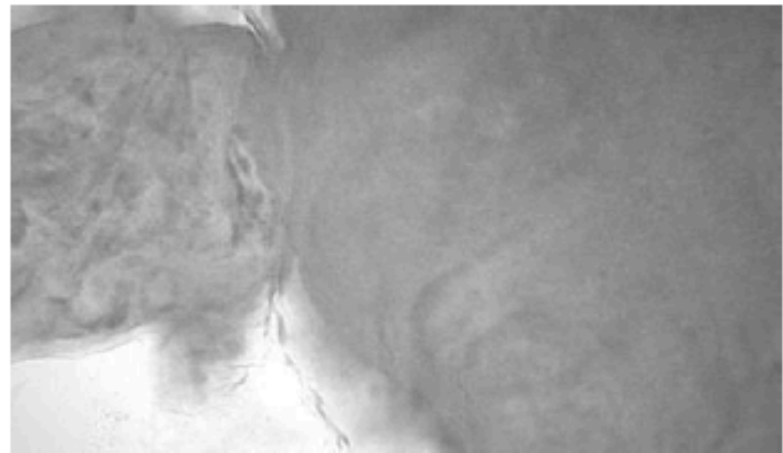**D**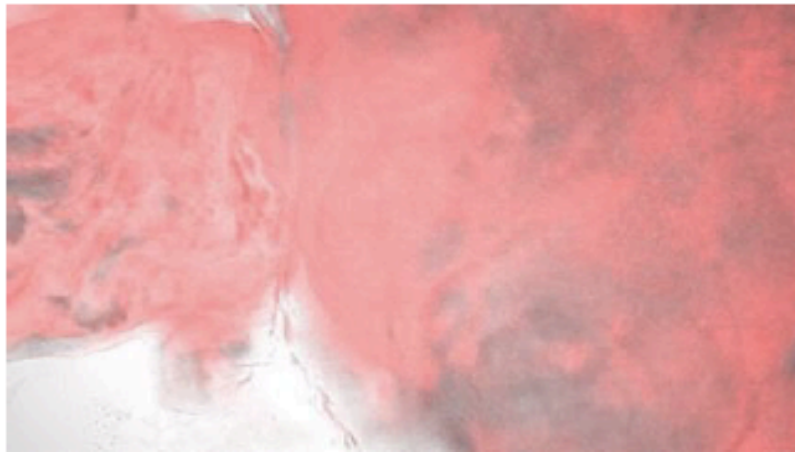

Supplement: pai-7-1-s03.pdf [file pai-7-1-s03.pdf]
